# Supplementary material
Source: PubMed Central journal article supplement (PMC218725)
Supplement: pnas_2033320100_1.pdf [file pnas_2033320100_1.pdf]

**Table 1. Experimental and calculated rotational diffusion coefficients for 16 monomeric proteins in H<sub>2</sub>O at 20°C**

| Protein                                 | $M_P$ | PDB  | $D_R^{SE}$ | $D_R^{calc}$ | $D_R^{expt}$ | $A^{calc}$ | Ref. |
|-----------------------------------------|-------|------|------------|--------------|--------------|------------|------|
| Bovine pancreatic trypsin inhibitor     | 6.50  | 6pti | 85.4       | 38.2         | 42.5         | 1.32       | 1    |
| Calbindin D <sub>9k</sub> , holo form   | 8.48  | 1ig5 | 65.5       | 33.7         | 32.9         | 1.11       | 2    |
| Human ubiquitin                         | 8.55  | 1ubq | 65.0       | 28.7         | 34.6         | 1.40       | 3    |
| Ferricytochrome <i>c</i> <sub>551</sub> | 8.68  | 351c | 64.0       | 33.5         | 31.6         | 0.94       | 4    |
| Plastocyanin, Cu(II) form               | 10.30 | 1pcs | 53.9       | 28.8         | 27.5         | 1.29       | 5    |
| Oncogenic protein p13 <sup>MTCPI</sup>  | 12.60 | 1a1x | 44.1       | 19.3         | 17.0         | 1.15       | 6    |
| Binase                                  | 12.94 | 1gou | 42.9       | 22.0         | 21.5         | 1.27       | 7    |
| Ribonuclease A                          | 13.67 | 1aqp | 40.6       | 19.3         | 22.1         | 1.32       | 8    |
| Azurin, Cu(I) form                      | 13.93 | 1e5y | 39.9       | 19.8         | 21.6         | 1.29       | 9    |
| Response regulator Spo0F                | 14.21 | 4nat | 39.1       | 21.6         | 20.2         | 0.89       | 10   |
| Hen egg-white lysozyme                  | 14.30 | 1bwi | 38.8       | 20.1         | 20.2         | 1.42       | 11   |
| Epidermal fatty acid-binding protein    | 15.15 | 1b56 | 36.7       | 18.8         | 17.3         | 1.14       | 12   |
| Dihydrofolate reductase, folate complex | 18.00 | 1dyi | 30.9       | 15.5         | 16.7         | 1.18       | 13   |
| Bovine $\beta$ -lactoglobulin, monomer  | 18.26 | 1b8e | 30.4       | 15.2         | 15.2         | 0.93       | 14   |
| Adenylate kinase, apo form              | 23.57 | 4ake | 23.6       | 9.15         | 8.62         | 1.40       | 15   |
| Savinase                                | 26.68 | 1svn | 20.8       | 12.7         | 13.5         | 1.07       | 16   |

$M_P$  is the molar mass in kg mol<sup>-1</sup>. All rotational diffusion coefficient ( $D_R$ ) values are given in units of  $\mu\text{s}^{-1}$ .  $D_R^{SE}$  (SE, Stokes–Einstein) was calculated from Eq. 1 with the partial protein volume obtained from  $M_P$  and a specific volume of 0.73 cm<sup>3</sup> g<sup>-1</sup>,  $D_R^{calc}$  was calculated by HYDROPRO with  $\sigma_H = 0.30$  nm and atomic coordinates from the quoted Protein Data Bank (PDB) crystal structure, and  $D_R^{expt}$  was derived from <sup>15</sup>N relaxation data as reported in the quoted references.  $A^{calc}$  is the calculated rotational anisotropy, as defined in the text.

1. Beeser, S. A., Goldenberg, D. P. & Oas, T. G. (1997) *J. Mol. Biol.* **269**, 154-164.
2. Kördel, J., Skelton, N. J., Akke, M., Palmer, A. G. & Chazin, W. J. (1992) *Biochemistry* **31**, 4856-4866.
3. Tjandra, N., Feller, S. E., Pastor, R. W. & Bax, A. (1995) *J. Am. Chem. Soc.* **117**, 12562-12566.
4. Russell, B. S., Zhong, L., Bigotti, M. G., Cutruzzolà, F. & Bren, K. L. (2003) *J. Biol. Inorg. Chem.* **8**, 156-166.
5. Bertini, I., Bryant, D. A., Ciurli, S., Dikiy, A., Fernández, C. O., Luchinat, C., Safarov, N., Vila, A. J. & Zhao, J. (2001) *J. Biol. Chem.* **276**, 47217-47226.
6. Guignard, L., Padilla, A., Mispelter, J., Yang, Y.-S., Stern, M.-H., Lhoste, J.-M. & Roumestand, C. (2000) *J. Biomol. NMR* **17**, 215-230.
7. Pang, Y., Buck, M. & Zuiderweg, E. R. P. (2002) *Biochemistry* **41**, 2655-2666.
8. Cole, R. & Loria, J. P. (2002) *Biochemistry* **41**, 6072-6081.
9. Kalverda, A. P., Ubbink, M., Gilardi, G., Wijmenga, S. S., Crawford, A., Jeuken, L. J. C. & Canters, G. W. (1999) *Biochemistry* **38**, 12690-12697.
10. Feher, V. A., Zapf, J. W., Hoch, J. A., Whiteley, J. M., McIntosh, L. P., Rance, M., Skelton, N. J., Dahlquist, F. W. & Cavanagh, J. (1997) *Biochemistry* **36**, 10015-10025.
11. Buck, M., Boyd, J., Redfield, C., MacKenzie, D. A., Jeenes, D. J., Archer, D. B. & Dobson, C. M. (1995) *Biochemistry* **34**, 4041-4055.
12. Gutiérrez-González, L. H., Ludwig, C., Hohoff, C., Rademacher, M., Hanhoff, T., Rüterjans, H., Spener, F. & Lücke, C. (2002) *Biochem. J.* **364**, 725-737.
13. Epstein, D. M., Benkovic, S. J. & Wright, P. E. (1995) *Biochemistry* **34**, 11037-11048.
14. Uhrinova, S., Smith, M. H., Jameson, G. B., Uhrin, D., Sawyer, L. & Barlow, P. N. (2000) *Biochemistry* **39**, 3565-3574.
15. Shapiro, Y. E., Sinev, M. A., Sineva, E. V., Tugarinov, V. & Meirovitch, E. (2000) *Biochemistry* **39**, 6634-6644.
16. Remerowski, M. L., Pepermans, H. A. M., Hilbers, C. W. & van de Ven, F. J. M. (1996) *Eur. J. Biochem.* **235**, 629-640.
